# Supplementary material for: Unlocking branched cutin via sudden supercritical water hydrolysis of tomato peel
Source: Royal Society of Chemistry journal article supplement (doi:10.1039/d5gc00375j), 2025-01-01
Supplement: d5gc00375j1.pdf [file d5gc00375j1.pdf]

### Supplementary information

Table S1. The standard percentile readings from the analysis d (0.1), d (0.5), and d (0.9).

| Experiment    |         | d (0.1), $\mu\text{m}$ | d (0.5), $\mu\text{m}$ | d (0.9), $\mu\text{m}$ |
|---------------|---------|------------------------|------------------------|------------------------|
| 0.15 s*       | Feed    | 10.622                 | 67.576                 | 194.365                |
|               | Product | 3.900                  | 18.935                 | 59.880                 |
| 0.16 s        | Feed    | 8.767                  | 46.730                 | 177.316                |
|               | Product | 4.500                  | 19.995                 | 61.356                 |
| 0.40 s        | Feed    | 9.900                  | 43.522                 | 136.032                |
|               | Product | 4.581                  | 21.640                 | 51.351                 |
| 0.48 s        | Feed    | 13.838                 | 63.327                 | 196.362                |
|               | Product | 3.018                  | 17.026                 | 39.732                 |
| 0.70 s        | Feed    | 11.612                 | 81.564                 | 242.200                |
|               | Product | 5.575                  | 24.759                 | 114.322                |
| 0.70 s*       | Feed    | 11.016                 | 76.513                 | 219.105                |
|               | Product | 4.566                  | 21.031                 | 53.417                 |
| 0.79 s        | Feed    | 12.373                 | 75.159                 | 206.867                |
|               | Product | 4.107                  | 22.242                 | 60.951                 |
| 0.80 / 0.86 s | Feed    | 13.880                 | 82.554                 | 226.601                |
|               | Product | 3.765                  | 21.683                 | 63.902                 |
| 0.86 s        | Product | 3.356                  | 17.127                 | 47.214                 |
|               | Feed    | 14.563                 | 84.021                 | 245.385                |
| 1.51 s        | Product | 20.084                 | 61.712                 | 111.822                |
|               | Feed    | 14.816                 | 70.582                 | 221.492                |
| 1.84 s        | Product | 7.227                  | 29.836                 | 61.932                 |

\*Experiments with the addition of acetic acid

Table S2. Mass balance of solid parts of products and feeds.

| t / t at 375 °C* | Extractives, % | Cutin, %     | Cellulose, % | Hemicellulose, % | Protein, %   | Other |
|------------------|----------------|--------------|--------------|------------------|--------------|-------|
| Feed             | 7.18 ± 0.85    | 53.97 ± 0.98 | 14.62 ± 0.85 | 2.46 ± 0.54      | 8.41 ± 0.38  | 13.36 |
| 0.25 s / 0.48 s  | 11.15 ± 1.17   | 66.44 ± 0.62 | 13.24 ± 1.84 | 0.00 ± 0.00      | 4.29 ± 0.12  | 4.88  |
| Feed             | 6.48 ± 2.02    | 55.14 ± 1.06 | 14.07 ± 1.16 | 2.67 ± 0.34      | 8.39 ± 0.15  | 13.25 |
| 1.05 s / 1.84 s  | 14.35 ± 0.83   | 71.99 ± 0.59 | 6.75 ± 1.24  | 0.00 ± 0.00      | 3.02 ± 0.03  | 3.89  |
| Feed             | 6.14 ± 1.90    | 56.02 ± 1.72 | 17.07 ± 0.14 | 3.09 ± 0.02      | 7.88 ± 0.23  | 9.80  |
| 6.33 s / 0.40 s  | 10.34 ± 2.13   | 67.12 ± 0.28 | 16.41 ± 0.71 | 0.00 ± 0.00      | 3.58 ± 0.28  | 2.55  |
| Feed             | 8.21 ± 4.32    | 44.94 ± 2.99 | 18.11 ± 1.16 | 3.10 ± 0.50      | 7.79 ± 0.31  | 17.85 |
| 0.06 s / 0.16 s  | 10.85 ± 0.34   | 65.55 ± 0.85 | 15.79 ± 1.04 | 0.00 ± 0.00      | 4.12 ± 0.05  | 3.69  |
| Feed             | 7.78 ± 2.00    | 40.48 ± 2.40 | 19.63 ± 0.34 | 4.96 ± 0.09      | 11.08 ± 0.76 | 16.07 |
| 0.53 s / 0.70 s  | 12.39 ± 0.14   | 54.56 ± 0.52 | 18.92 ± 0.48 | 0.00 ± 0.00      | 4.07 ± 0.26  | 10.06 |
| Feed**           | 8.65 ± 1.79    | 43.43 ± 2.56 | 18.88 ± 0.94 | 5.03 ± 0.28      | 10.62 ± 0.35 | 13.39 |

|                      |              |              |              |             |              |       |
|----------------------|--------------|--------------|--------------|-------------|--------------|-------|
| 0.52 s /<br>0.70 s** | 13.97 ± 1.44 | 59.51 ± 5.03 | 14.12 ± 0.33 | 0.08 ± 0.05 | 3.16 ± 0.15  | 9.16  |
| Feed                 | 18.30 ± 1.62 | 38.58 ± 0.21 | 13.64 ± 3.03 | 2.17 ± 0.38 | 11.20 ± 0.27 | 16.11 |
| 0.37 s /<br>0.86 s   | 18.59 ± 0.57 | 57.00 ± 1.18 | 13.90 ± 0.16 | 0.00 ± 0.00 | 5.25 ± 0.56  | 5.26  |
| 0.51 s /<br>0.80 s   | 18.43 ± 0.98 | 59.48 ± 0.69 | 14.10 ± 0.22 | 0.00 ± 0.00 | 5.62 ± 0.70  | 2.37  |
| Feed**               | 12.13 ± 5.12 | 44.22 ± 1.60 | 16.55 ± 1.98 | 3.65 ± 0.50 | 10.99 ± 0.01 | 12,46 |
| 0.49 s /<br>0.79 s** | 18.85 ± 5.92 | 59.85 ± 0.95 | 8.15 ± 3.18  | 0.00 ± 0.00 | 4.37 ± 0.26  | 8.78  |
| Feed                 | 12.54 ± 0.39 | 44.13 ± 0.36 | 14.62 ± 3.08 | 3.03 ± 0.49 | 10.09 ± 2.06 | 15.59 |
| 0.89 s /<br>1.51 s   | 25.75 ± 2.38 | 62.81 ± 0.61 | 2.79 ± 0.06  | 0.00 ± 0.00 | 6.44 ± 0.96  | 2.21  |

\* t – reaction time, t at 375 °C – reaction time at 375 °C

\*\* experiments with the addition of acetic acid
